# Supplementary material
Source: PubMed Central journal article supplement (PMC2655123)
Supplement: NIHMS96038-supplement-Table_S1.pdf [file NIHMS96038-supplement-Table_S1.pdf]

**Table S1. Amino Acid Residues of PrgX Comprising  $\alpha$ -helical Sub-domains.**

---

| Helix Num | Starting | Ending |
|-----------|----------|--------|
| 1         | 4        | 15     |
| 2         | 19       | 22     |
| 3         | 29       | 37     |
| 4         | 44       | 54     |
| 5         | 58       | 66     |
| 6         | 74       | 87     |
| 7         | 92       | 102    |
| 8         | 107      | 123    |
| 9         | 128      | 142    |
| 10        | 150      | 162    |
| 11        | 165      | 175    |
| 12        | 184      | 204    |
| 13        | 207      | 221    |
| 14        | 230      | 248    |
| 15        | 251      | 267    |
| 16        | 270      | 287    |
| 17        | 294      | 305    |

---
